# Supplementary material
Source: PubMed Central journal article supplement (PMC3959278)
Supplement: NIHMS543138-supplement-01.pdf [file NIHMS543138-supplement-01.pdf]

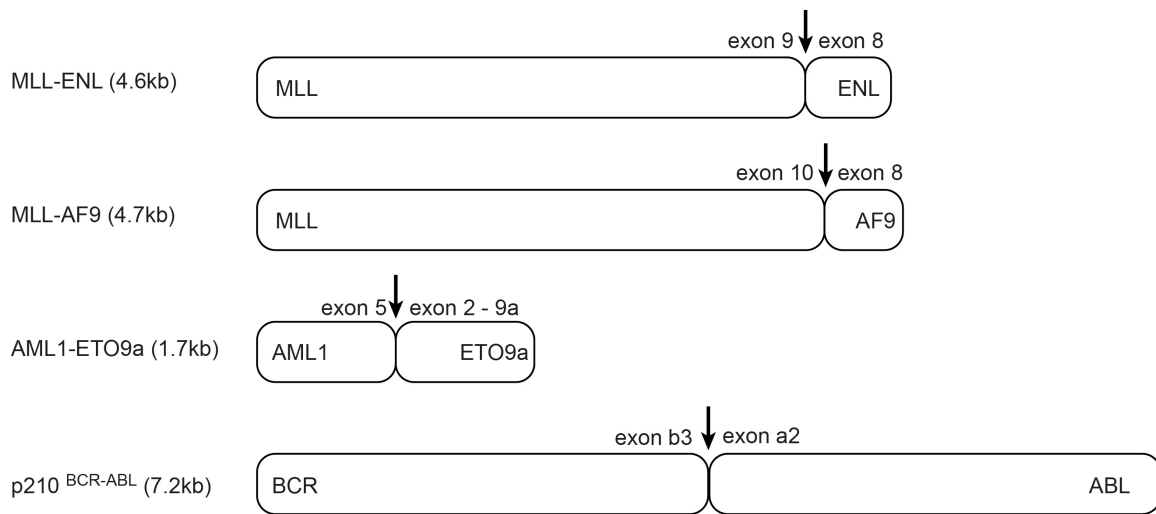

**Fig. S1: Schematic representation of leukemic fusions used.**

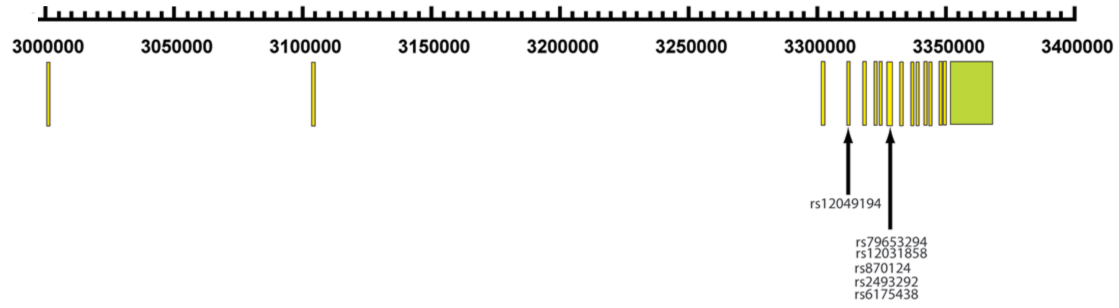

**Fig. S2:** Location of non-synonymous SNPs in the PRDM16 gene on chr. 1 in humans (yellow: exons, green: 3' UTR)

**Table S1: Transduction efficiencies, number of injected cells, and mortality data**

| Retrovirus         | Transduction efficiency (%)              | Transduced cells (#) | Mortality             | Observation period |
|--------------------|------------------------------------------|----------------------|-----------------------|--------------------|
| MLL-ENL-GFP        | WT (0.45 - 2.13%), Flt3KO (0.36 - 1.68%) | 3,600 - 16,800       | WT 10/34, Flt3KO 1/31 | 350 days           |
| MLL-ENL-GFP        | WT 7.05%, Flt3KO 7.77%                   | 70,000               | WT 6/10, Flt3KO 1/10  | 210 days           |
| MLL-ENL-hNGFR      | WT 25.4%, Flt3KO 23.9%                   | 250,000              | WT 5/5, Flt3KO 1/5    | 200 days           |
| MLL-AF9-YFP        | WT 0.68%, Flt3KO 0.40%                   | 4,000                | WT 5/5, Flt3KO 5/5    | 64 days            |
| MLL-AF9-YFP        | WT 2.56%, Flt3KO 3.29%                   | 25,600               | WT 5/5, Flt3KO 5/5    | 79 days            |
| AML1-ETO9a-GFP     | WT (0.98 - 6.21%), Flt3KO (1.23 - 5.12%) | 9,800 - 51,200       | WT 11/16, Flt3KO 9/15 | 200 days           |
| p210 BCR-ABL-hNGFR | WT 9.02%, Flt3KO 12.00%                  | 90,000               | WT 5/5, Flt3KO 5/5    | 90 days            |
| p210 BCR-ABL-hNGFR | WT 3.61%, Flt3KO 6.62%                   | 36,100               | WT 5/5, Flt3KO 5/5    | 76 days            |
